# Supplementary material
Source: Frontiers journal article supplement (https://www.frontiersin.org/articles/530144)

## Supplementary Material

**Supplementary Table 1:**

The number of human-wildlife conflict (HWC) incidents receiving compensation/ex-gratia payments between 2014 and 2019 in administrative divisions covering the Wild Seve implementation area. Data obtained from the Annual Reports of the Karnataka Forest Department\*. Data on HWC incidents and payment was not present in the 2015-16 Annual Report.

| HWC Category                  | Chamarajanagar Circle |         |         |         | Mysore Circle |         |         |         |
|-------------------------------|-----------------------|---------|---------|---------|---------------|---------|---------|---------|
|                               | 2014-15               | 2016-17 | 2017-18 | 2018-19 | 2014-15       | 2016-17 | 2017-18 | 2018-19 |
| Crop Damage                   |                       |         |         |         |               |         |         |         |
| a) Incidents                  | 789                   | 739     | 983     | 921     | 4760          | 2574    | 3166    | 3409    |
| b) Payment (in thousand US\$) | 37.71                 | 172.33  | 78.13   | 66.08   | 169.63        | 435.31  | 170.95  | 199.79  |
| Property Loss                 |                       |         |         |         |               |         |         |         |
| a) Incidents                  | 13                    | 5       | 10      | 11      | 8             | 15      | 51      | 27      |
| b) Payment (in thousand US\$) | 0.48                  | 1.10    | 1.02    | 0.72    | 0.46          | 4.56    | 1.87    | 2.10    |
| Cattle Killed                 |                       |         |         |         |               |         |         |         |
| a) Incidents                  | 20                    | 51      | 69      | 77      | 368           | 428     | 608     | 588     |
| b) Payment (in thousand US\$) | 1.98                  | 17.19   | 10.47   | 8.18    | 25.06         | 139.01  | 54.36   | 55.84   |
| Human Injury                  |                       |         |         |         |               |         |         |         |
| a) Incidents                  | 13                    | 7       | 9       | 3       | 29            | 14      | 26      | 12      |
| b) Payment (in thousand US\$) | 3.16                  | 4.96    | 2.21    | 2.46    | 5.32          | 8.32    | 14.39   | 3.01    |
| Permanent Disability          |                       |         |         |         |               |         |         |         |
| a) Incidents                  | -                     | 1       | 1       | 2       | -             | 2       | -       | -       |
| b) Payment (in thousand US\$) | -                     | 6.66    | 3.69    | 7.31    | -             | 5.26    | -       | -       |
| Human Death                   |                       |         |         |         |               |         |         |         |
| a) Incidents                  | 7                     | 7       | 4       | 2       | 7             | 3       | 1       | 2       |
| b) Payment (in thousand US\$) | 55.15                 | 160.35  | 28.02   | 14.62   | 55.15         | 60.13   | 7.37    | 11.69   |

\*Annual Reports (2014-2019), Karnataka Forest Department, Government of Karnataka.  
<https://aranya.gov.in/aranyacms/English/AnnualReports.aspx>

**Supplementary Table 2:**

The number of human-wildlife conflict incidents registered by the Wild Seve program aggregated by villages and individuals between July 2015 and June 2019. Range classes were calculated using the Jenks natural breaks optimisation method (Jenks 1967)\*.

| Category    | Range class of the number of HWC incidents | Number of villages or individuals belonging to a range class | Number of HWC cases registered by Wild Seve |                                |                        |                                                                             |
|-------------|--------------------------------------------|--------------------------------------------------------------|---------------------------------------------|--------------------------------|------------------------|-----------------------------------------------------------------------------|
|             |                                            |                                                              | Average per range class                     | Std. Dev. (within range class) | Total from range class | Percentage contribution of the range class to the total number of incidents |
| Villages    | 1 - 12                                     | 201                                                          | 4.10                                        | 3.42                           | 824                    | 5.97%                                                                       |
|             | 13 - 36                                    | 78                                                           | 21.49                                       | 6.54                           | 1676                   | 12.14%                                                                      |
|             | 37 - 76                                    | 33                                                           | 54.61                                       | 10.94                          | 1802                   | 13.05%                                                                      |
|             | 77 - 132                                   | 17                                                           | 98.24                                       | 14.42                          | 1670                   | 12.09%                                                                      |
|             | 133 - 209                                  | 12                                                           | 171                                         | 23.09                          | 2052                   | 14.86%                                                                      |
|             | 210 - 278                                  | 7                                                            | 240.57                                      | 25.12                          | 1684                   | 12.20%                                                                      |
|             | 279 - 340                                  | 4                                                            | 312.00                                      | 27.39                          | 1248                   | 9.04%                                                                       |
|             | 341 - 418                                  | 2                                                            | 376.00                                      | 49.50                          | 752                    | 5.45%                                                                       |
|             | 419 - 522                                  | 2                                                            | 470.50                                      | 72.83                          | 941                    | 6.81%                                                                       |
|             | 523 - 1159                                 | 1                                                            | 1159                                        | -                              | 1159                   | 8.39%                                                                       |
| Individuals | 1                                          | 4208                                                         | 1                                           | 0                              | 4208                   | 30.48%                                                                      |
|             | 2 - 5                                      | 2020                                                         | 2.71                                        | 0.95                           | 5471                   | 39.62%                                                                      |
|             | 6 - 12                                     | 328                                                          | 7.77                                        | 1.79                           | 2550                   | 18.47%                                                                      |
|             | 13 - 31                                    | 79                                                           | 17.06                                       | 3.99                           | 1348                   | 9.76%                                                                       |
|             | 32 - 75                                    | 5                                                            | 46.20                                       | 17.56                          | 231                    | 1.67%                                                                       |

\*Jenks 1967: Jenks, George F. 1967. "The Data Model Concept in Statistical Mapping", International Yearbook of Cartography 7: 186-190.

## Supplementary Figure 1:

The Wild Seve program's workflow for monitoring and addressing human-wildlife conflict.

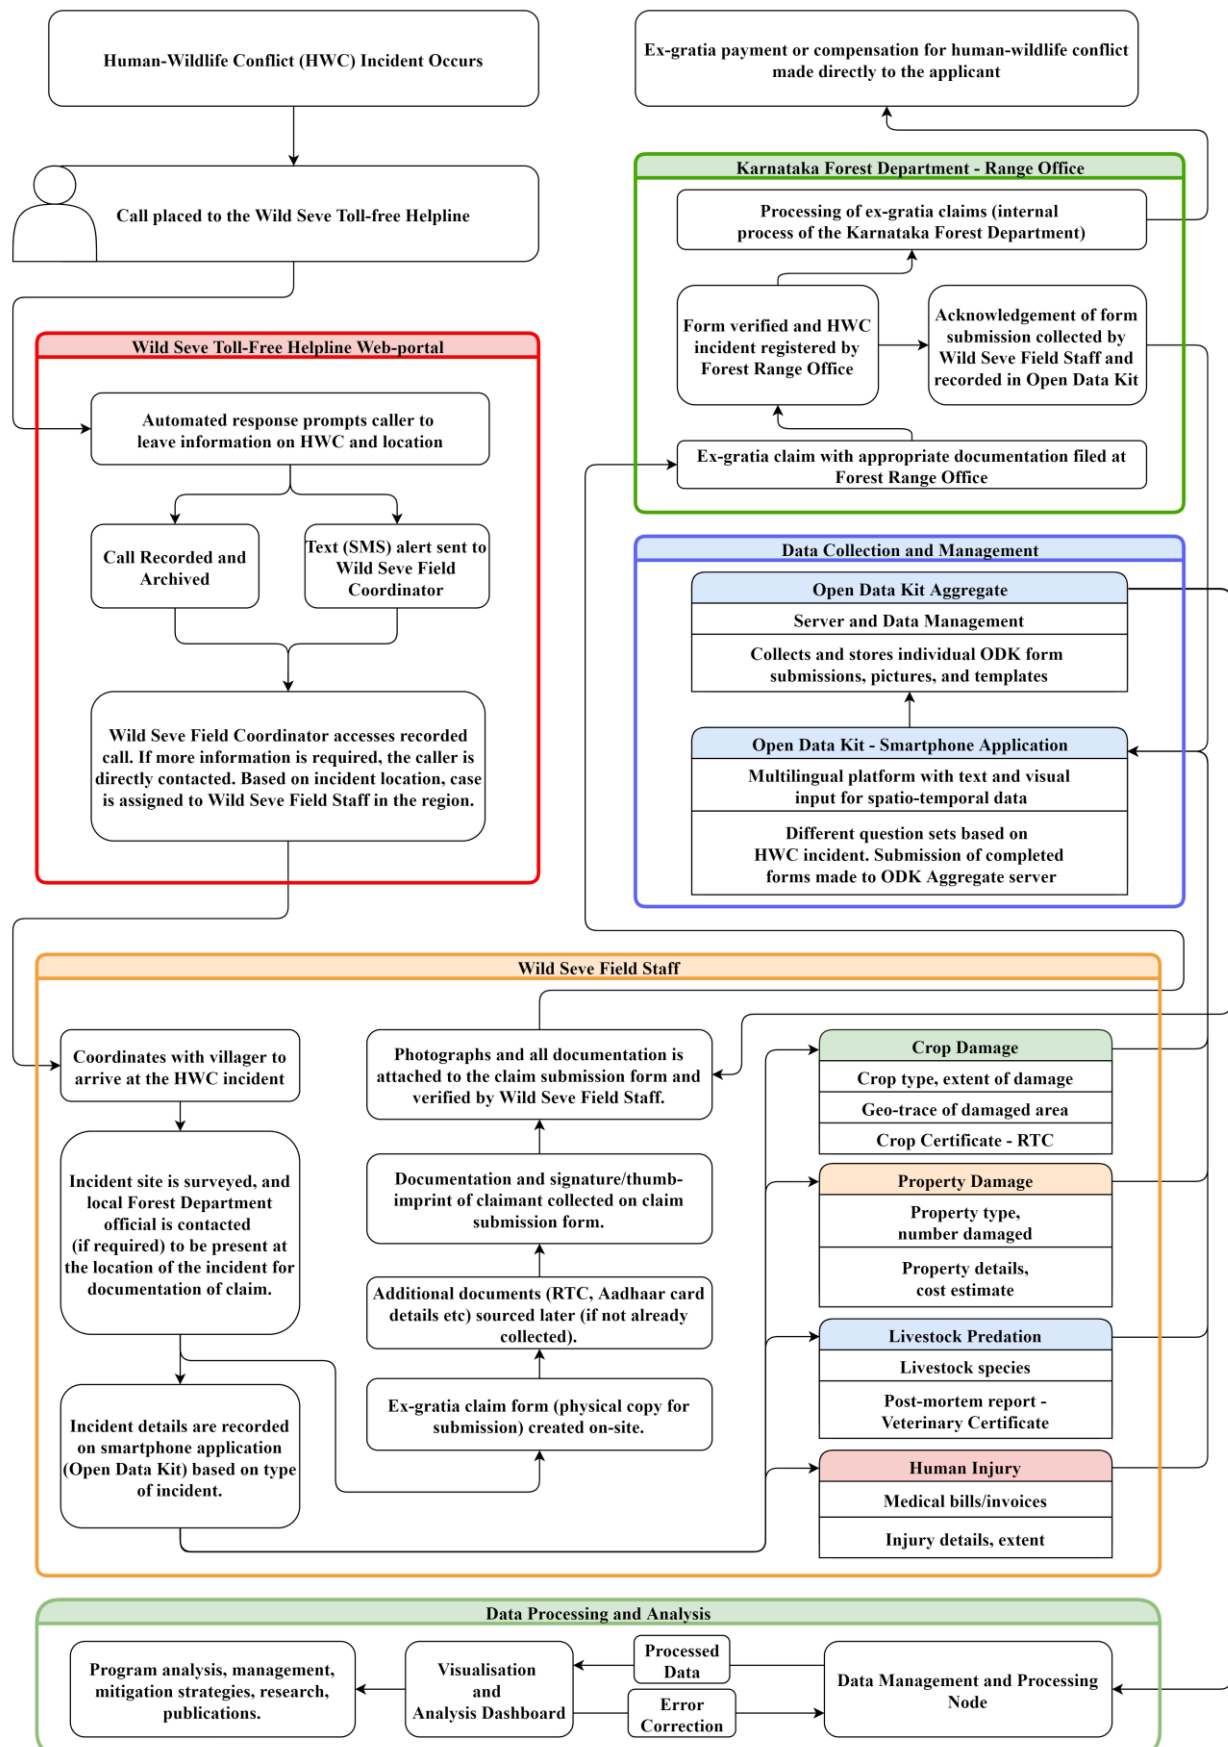

Supplement: Data_Sheet_1.pdf [file Data_Sheet_1.pdf]
